# Supplementary material for: Rare proximity enforced copper hydrogen interactions in copper(i)-chalcogenones
Source: Royal Society of Chemistry journal article supplement (doi:10.1039/d1nj00397f), 2021-01-01
Supplement: d1nj00397f1.pdf [file d1nj00397f1.pdf]

## Supporting Information

| Contents          | Table of contents                                                                       | Page No |
|-------------------|-----------------------------------------------------------------------------------------|---------|
| <b>Figure S1</b>  | FT-IR spectrum of <b>L</b> <sup>2</sup> (neat)                                          | 1       |
| <b>Figure S2</b>  | <sup>1</sup> H NMR spectrum of <b>L</b> <sup>2</sup> in CDCl <sub>3</sub> at RT         | 2       |
| <b>Figure S3</b>  | <sup>13</sup> C NMR spectrum of <b>L</b> <sup>2</sup> in CDCl <sub>3</sub> at RT        | 2       |
| <b>Figure S4</b>  | FT-IR spectrum of <b>1</b> (neat)                                                       | 3       |
| <b>Figure S5</b>  | <sup>1</sup> H NMR spectrum of <b>1</b> in DMSO- <i>d</i> <sub>6</sub> at RT            | 3       |
| <b>Figure S6</b>  | <sup>13</sup> C NMR spectrum of <b>1</b> in DMSO- <i>d</i> <sub>6</sub> at RT           | 4       |
| <b>Figure S7</b>  | <sup>11</sup> B NMR spectrum of <b>1</b> in DMSO- <i>d</i> <sub>6</sub> at RT           | 4       |
| <b>Figure S8</b>  | <sup>19</sup> F NMR spectrum of <b>1</b> in DMSO- <i>d</i> <sub>6</sub> at RT           | 5       |
| <b>Figure S9</b>  | FT-IR spectrum of <b>2</b> (neat)                                                       | 5       |
| <b>Figure S10</b> | <sup>1</sup> H NMR spectrum of <b>2</b> in DMSO- <i>d</i> <sub>6</sub> at RT            | 6       |
| <b>Figure S11</b> | <sup>13</sup> C NMR spectrum of <b>2</b> in DMSO- <i>d</i> <sub>6</sub> at RT           | 6       |
| <b>Figure S12</b> | <sup>11</sup> B NMR spectrum of <b>2</b> in DMSO- <i>d</i> <sub>6</sub> at RT           | 7       |
| <b>Figure S13</b> | <sup>19</sup> F NMR spectrum of <b>2</b> in DMSO- <i>d</i> <sub>6</sub> at RT           | 7       |
| <b>Figure S14</b> | The solid-state packing of <b>1</b> (up) and <b>2</b> (down). View along <i>c</i> axis. | 8       |

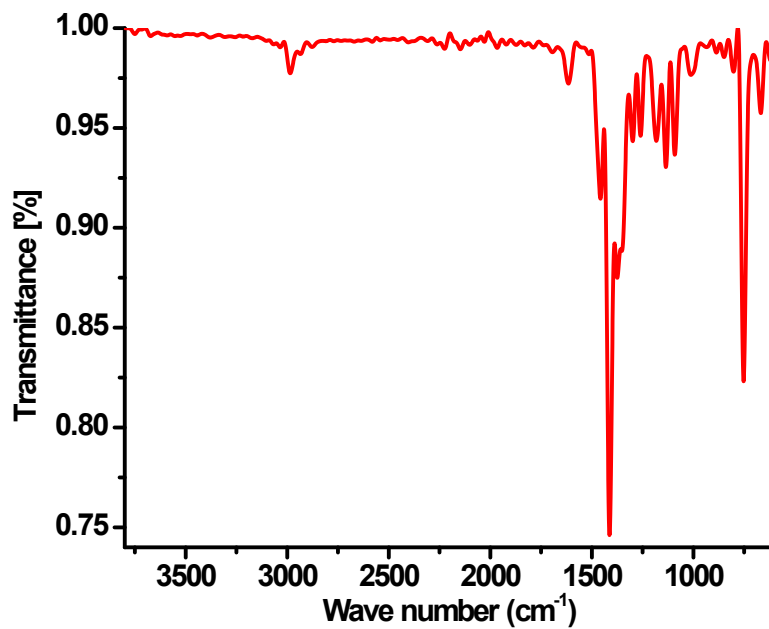

Figure S1: FT-IR spectrum of  $L^2$  (neat).

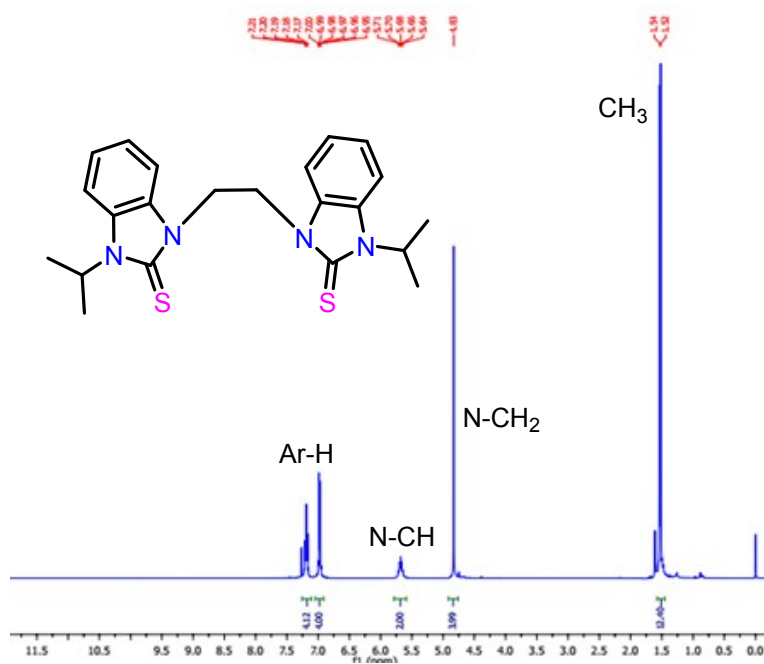

Figure S2:  $^1\text{H}$  NMR spectrum of  $L^2$  in  $\text{CDCl}_3$  at RT.

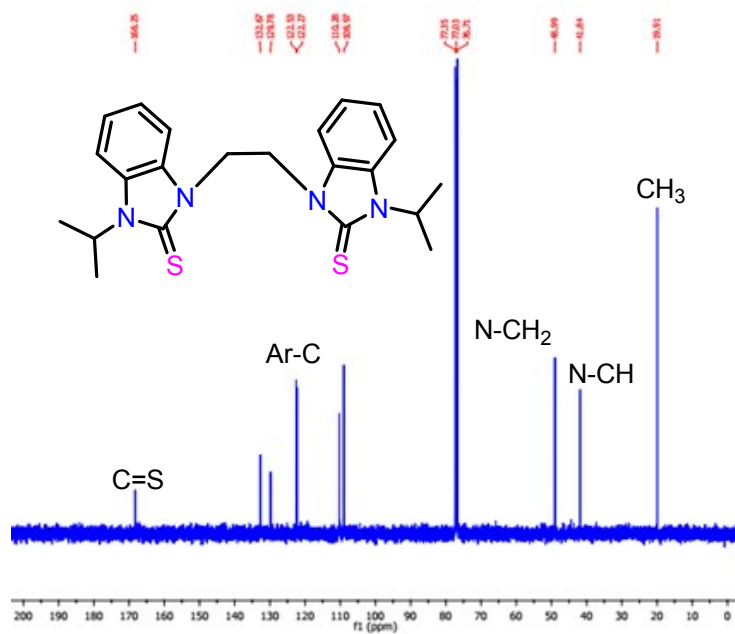

Figure S3:  $^{13}\text{C}$  NMR spectrum of  $L^2$  in  $\text{CDCl}_3$  at RT.

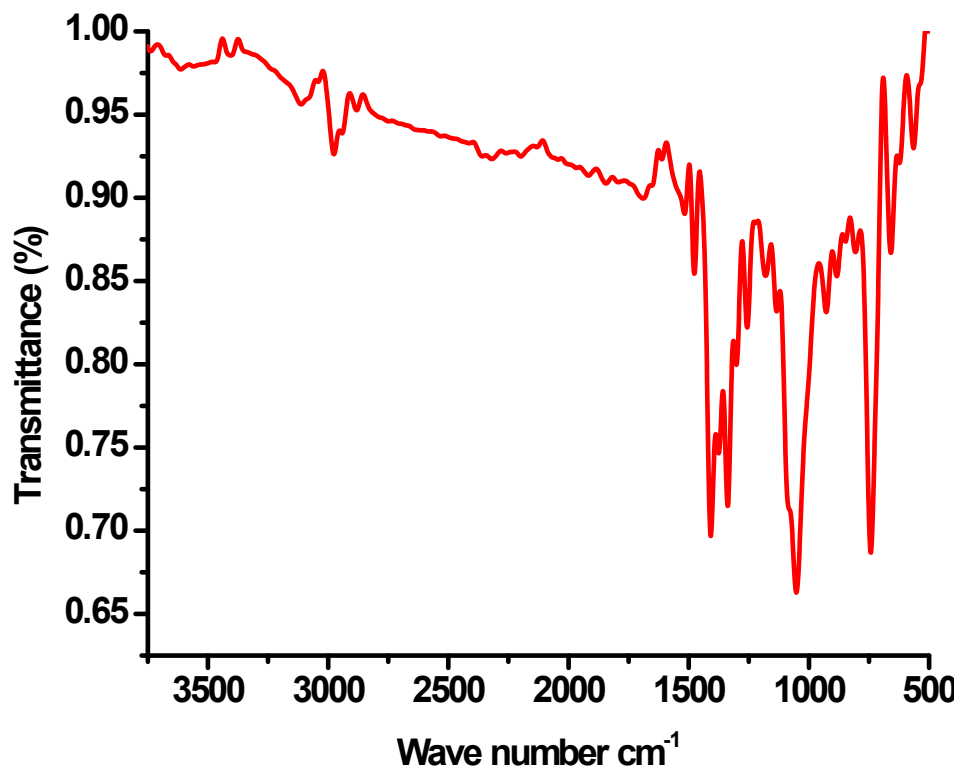

Figure S4. FT-IR spectrum of **1** (neat).

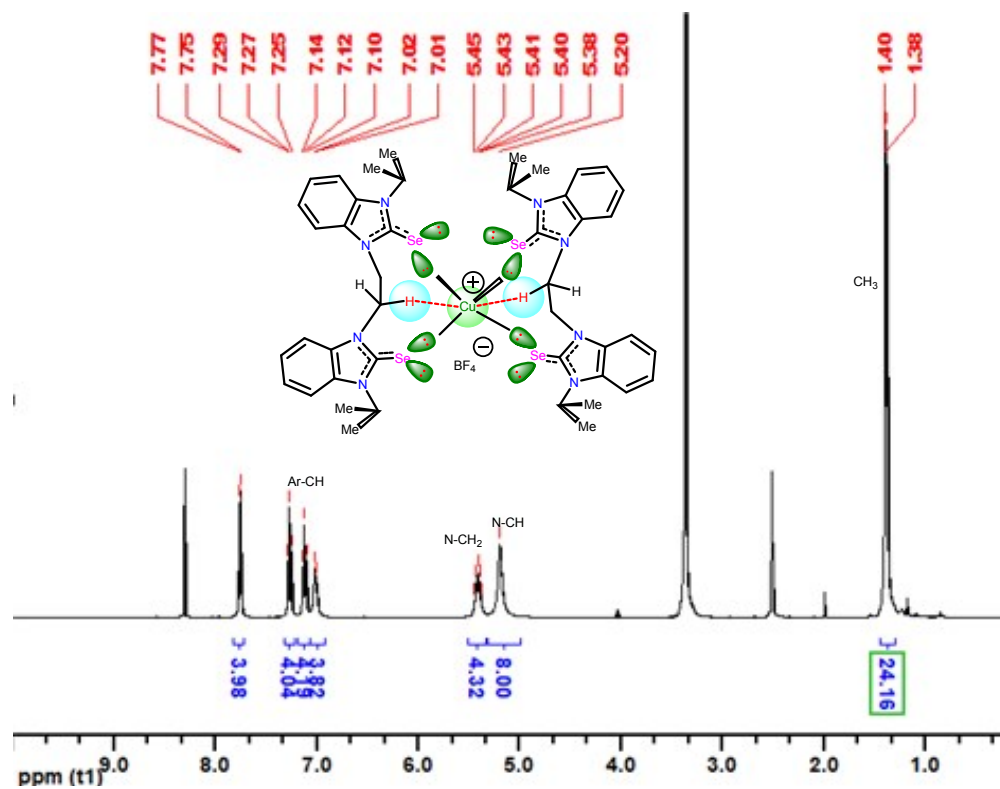

Figure S5.  $^1\text{H}$  NMR spectrum of **1** in  $\text{DMSO-}d_6$  at RT.

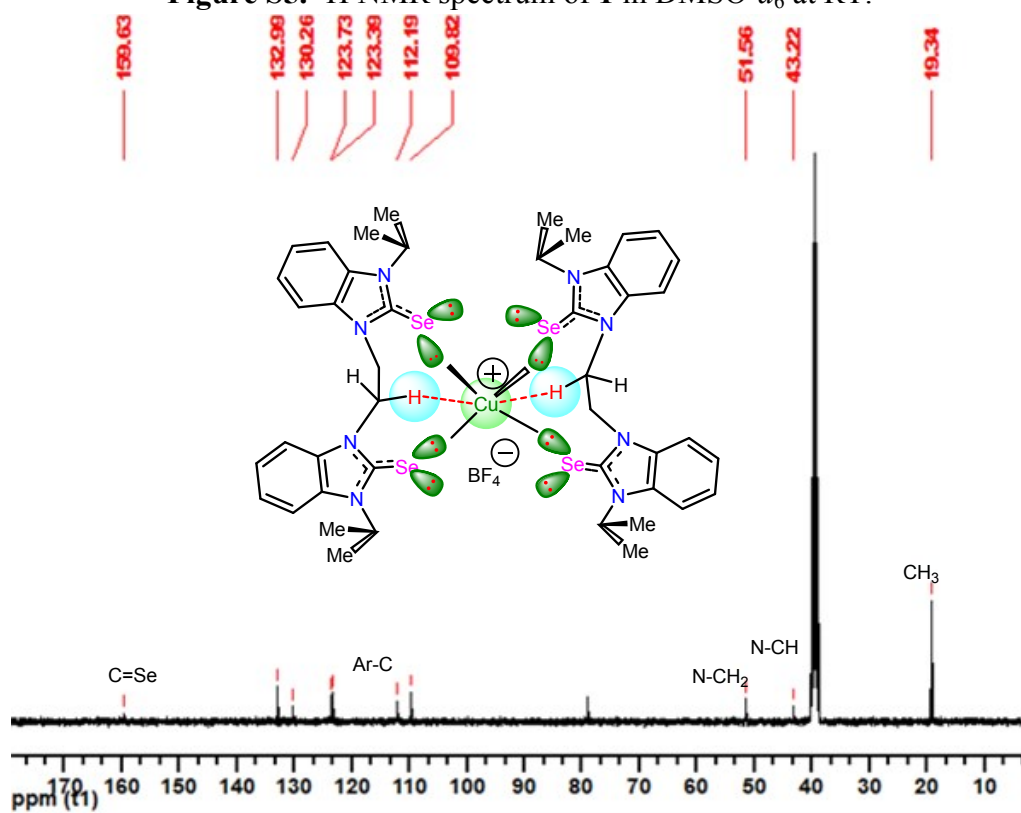

Figure S6.  $^{13}\text{C}$  NMR spectrum of **1** in  $\text{DMSO-}d_6$  at RT.

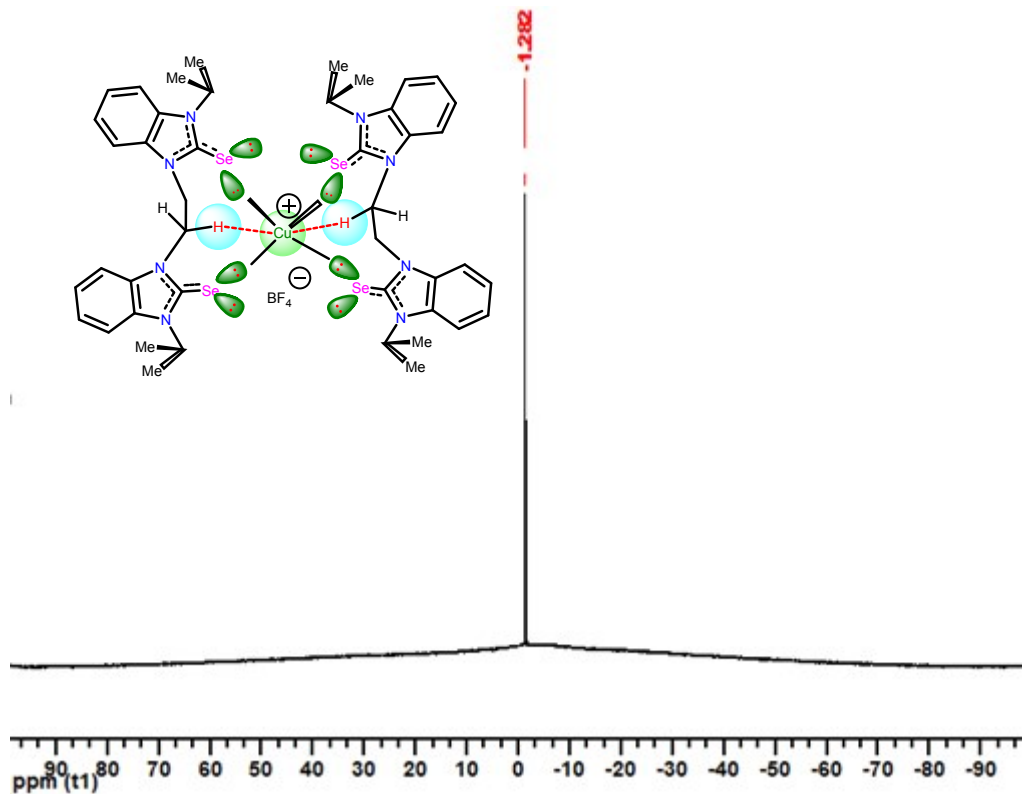

Figure S7.  $^{11}\text{B}$  NMR spectrum of **1** in  $\text{DMSO-}d_6$  at RT.

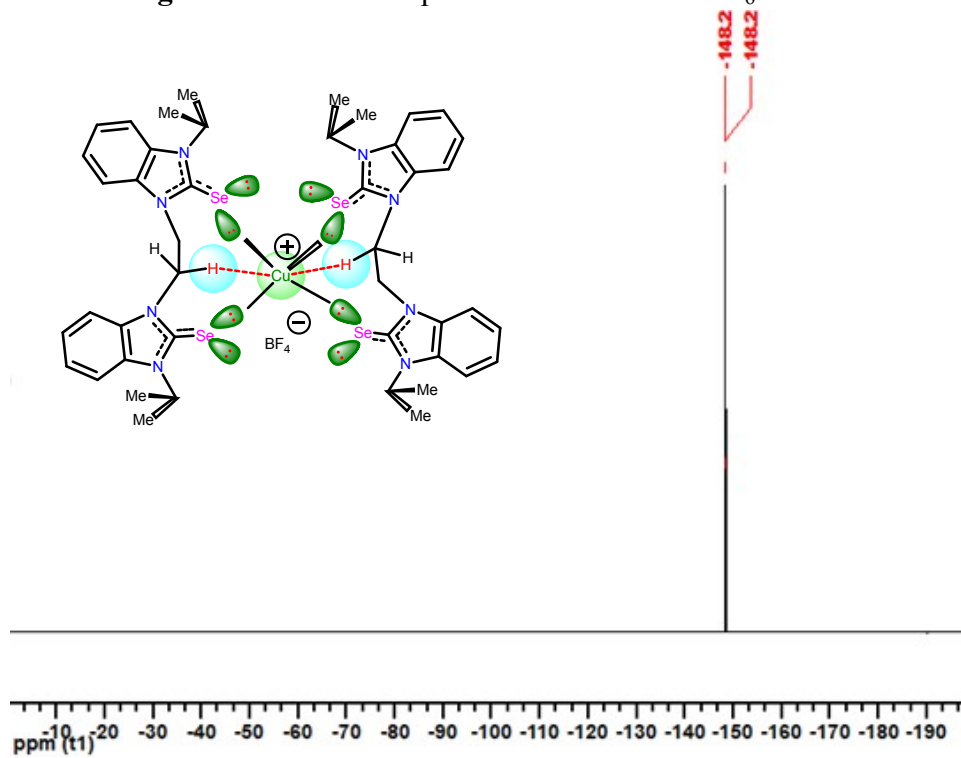

Figure S8.  $^{19}\text{F}$  NMR spectrum of **1** in  $\text{DMSO-}d_6$  at RT.

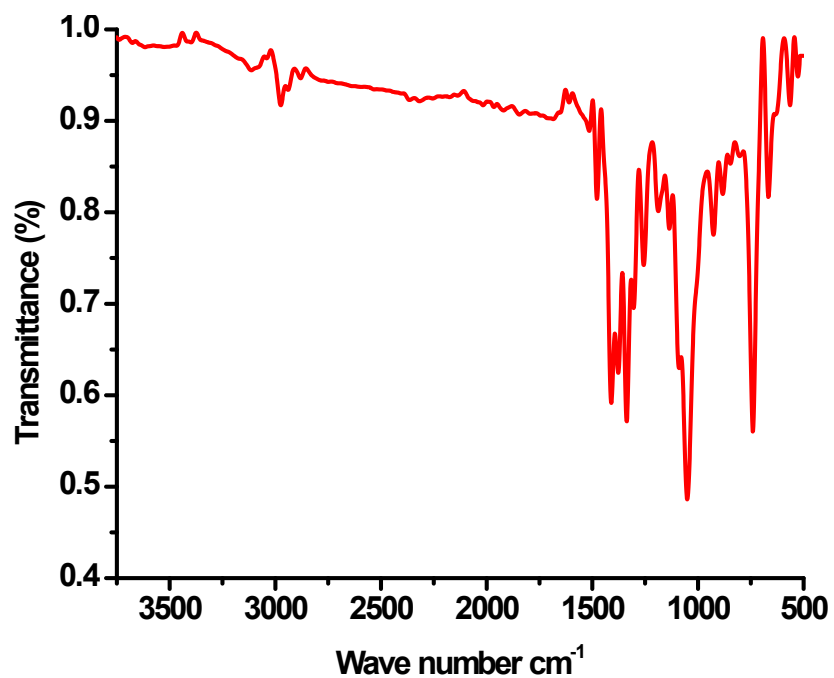

Figure S9. FT-IR spectrum of **2** (neat).

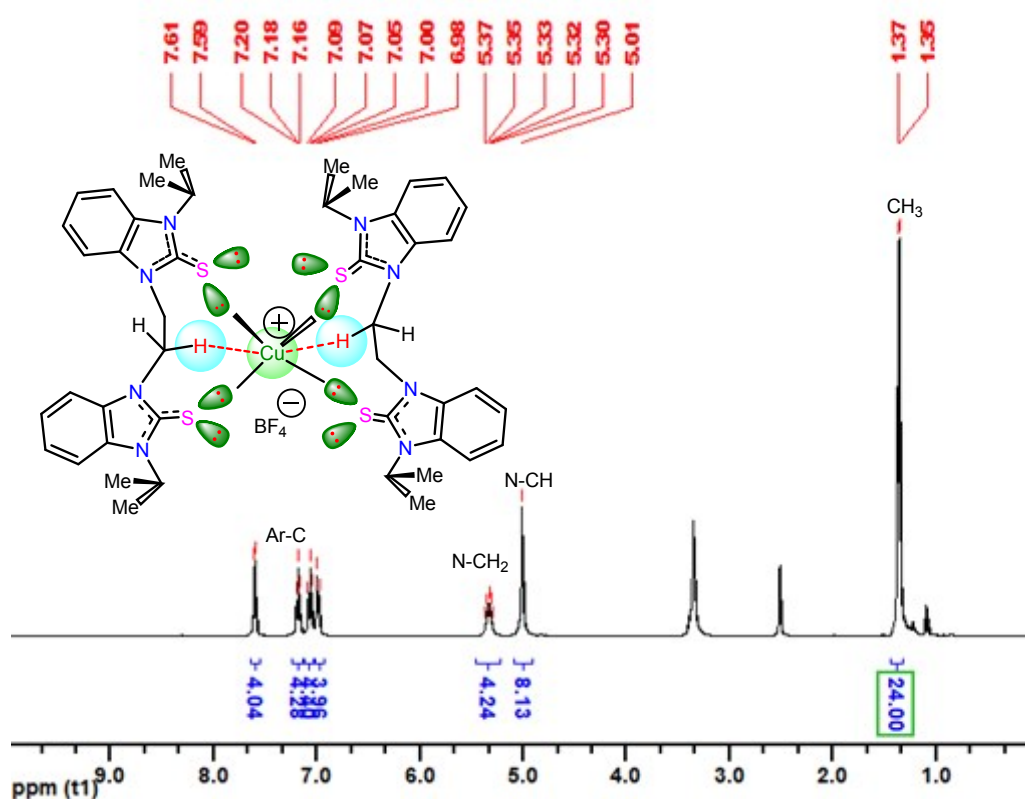

Figure S10.  $^1\text{H}$  NMR spectrum of **2** in  $\text{DMSO-}d_6$  at RT.

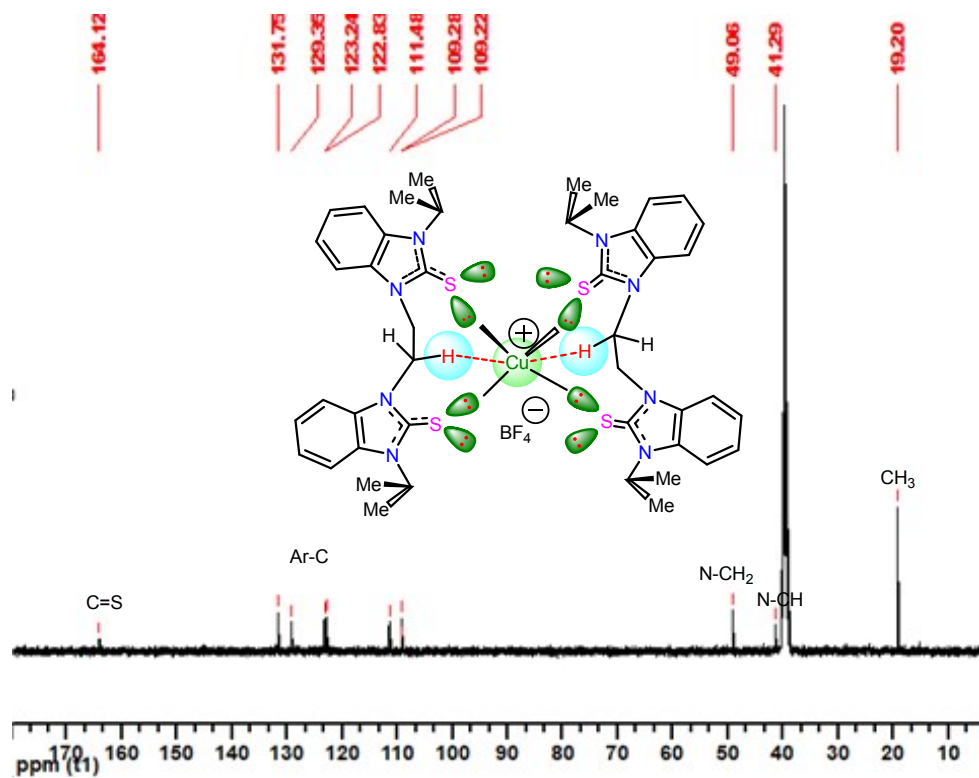

Figure S11. <sup>13</sup>C NMR spectrum of **2** in DMSO-*d*<sub>6</sub> at RT.

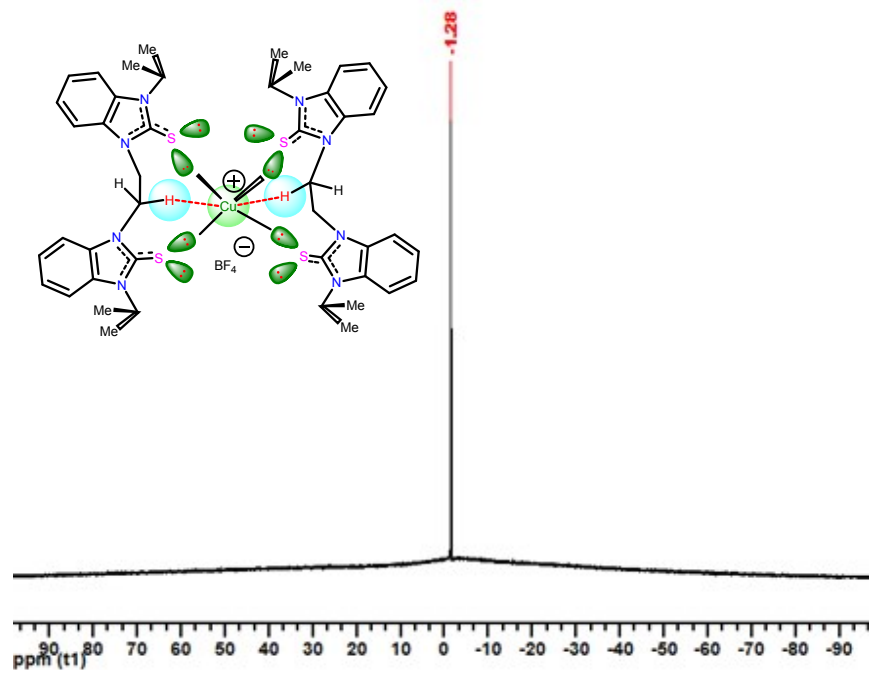

Figure S12. <sup>11</sup>B NMR spectrum **2** in DMSO-*d*<sub>6</sub> at RT.

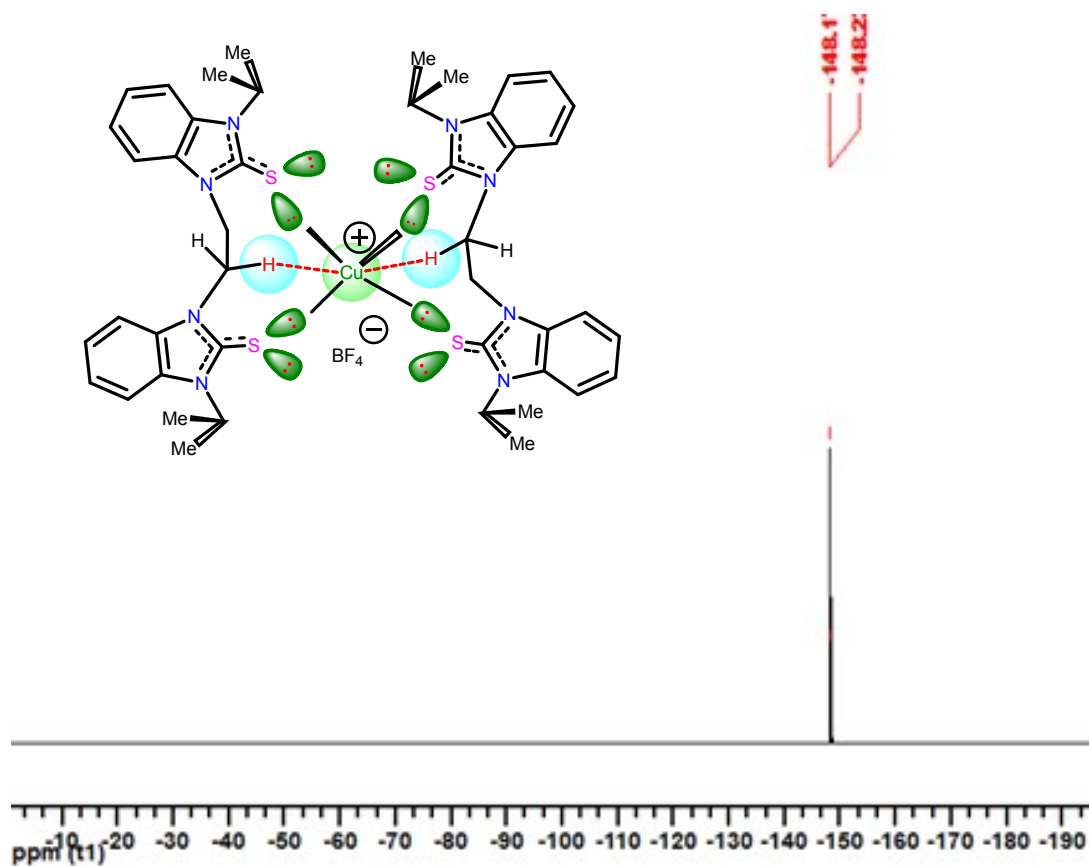

**Figure S13.**  $^{19}\text{F}$  NMR spectrum of **2** in  $\text{DMSO-}d_6$  at RT.

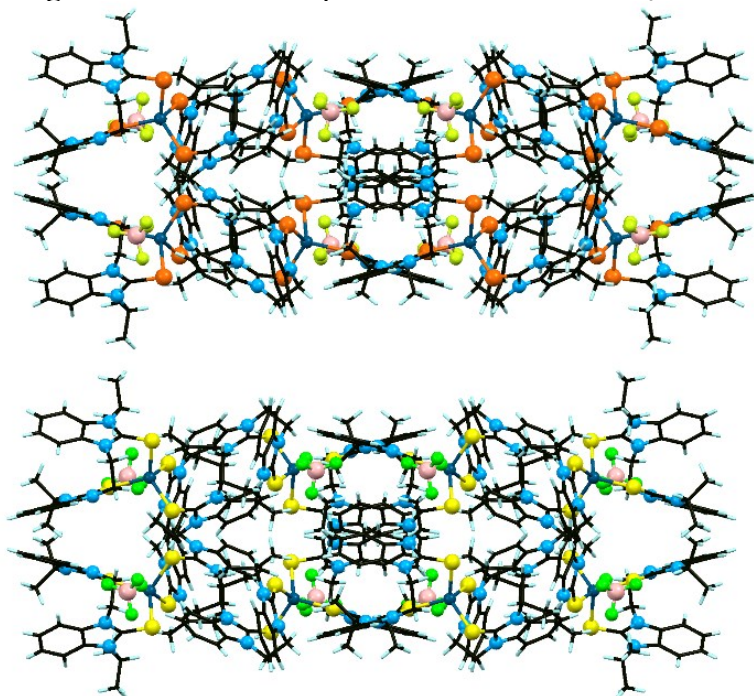

**Figure S14.** The solid-state packing of **1** (up) and **2** (down). View along  $c$  axis.
